# Supplementary material
Source: bioRxiv or medRxiv preprint supplement (https://www.biorxiv.org/highwire/filestream/2256/field_highwire_adjunct_files/31/008862-7.pdf)

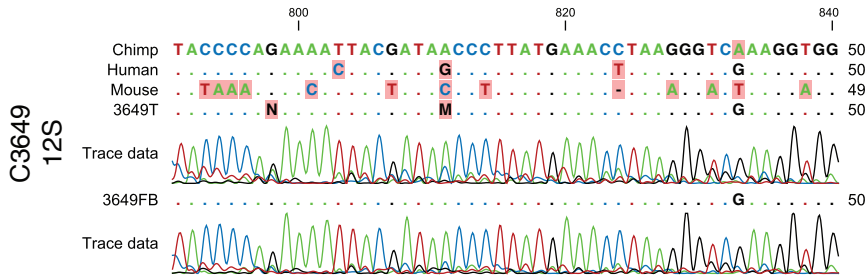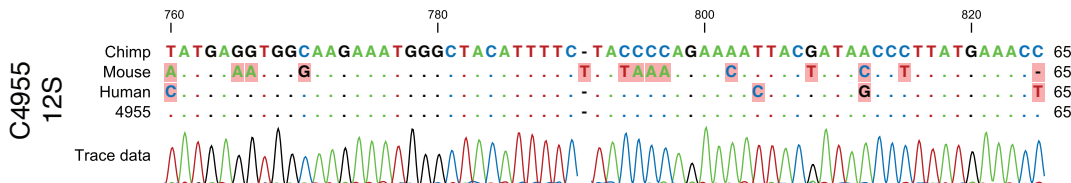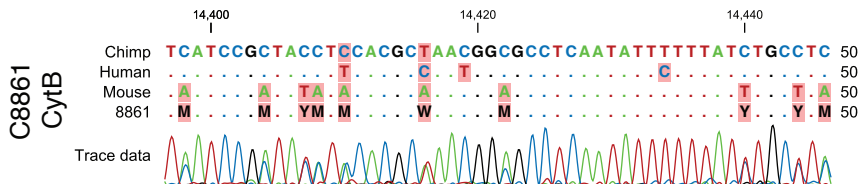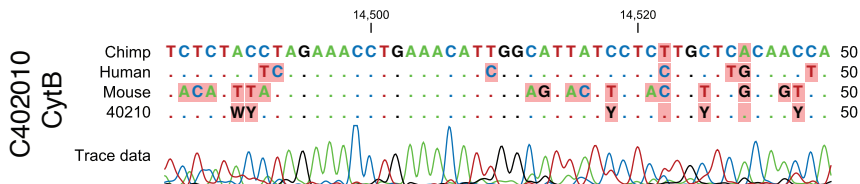

Supplement: Supplementary file [file 008862-7.pdf]
